# Supplementary material for: Impact of shallow sills on circulation regimes and submarine melting in glacial fjords
Source: Copernicus journal article supplement (doi:10.5194/tc-18-187-2024), 2024-01-09
Supplement: Supplementary file 1 [file tc-18-187-2024-supplement.pdf]

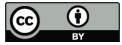

*Supplement of*

## **Impact of shallow sills on circulation regimes and submarine melting in glacial fjords**

**Weiyang Bao and Carlos Moffat**

*Correspondence to:* Weiyang Bao ([wbao@udel.edu](mailto:wbao@udel.edu))

The copyright of individual parts of the supplement might differ from the article licence.

## 1 Supplementary Figures

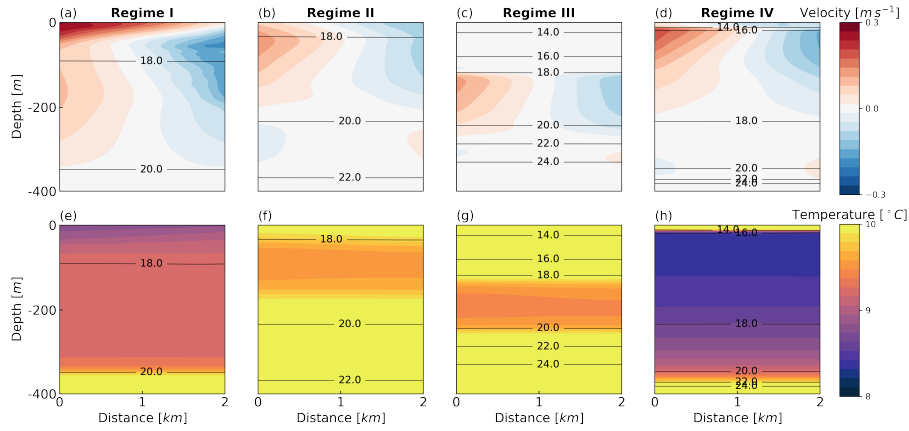

**Figure S1.** Snapshots of along-fjord circulation (top) and temperature (bottom) regimes viewed at cross-section S1. Black contours denote water density anomaly, positive values of velocity represent down-fjord currents.

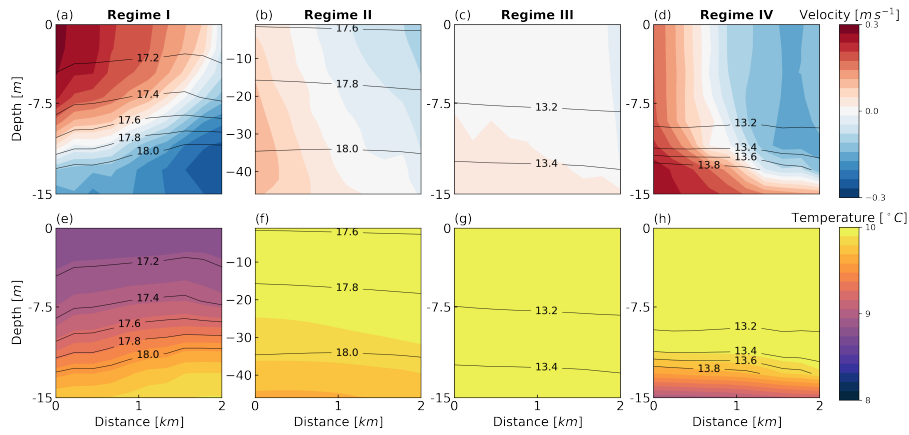

**Figure S2.** Snapshots of along-fjord circulation (top) and temperature (bottom) regimes viewed at the cross-fjord section above the sill. Black contours denote water density anomaly, positive values of velocity represent down-fjord currents.

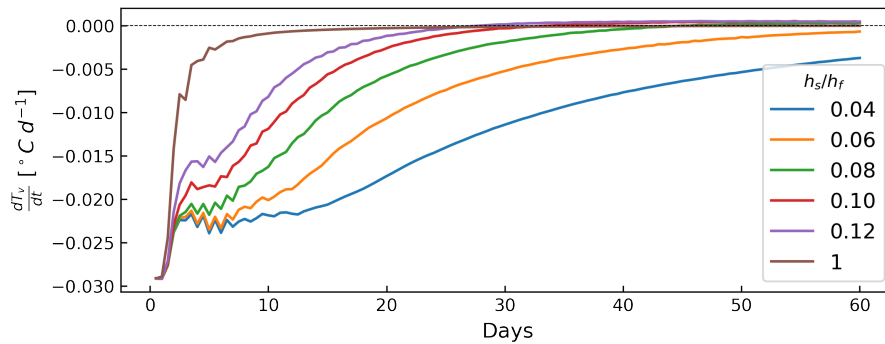

**Figure S3.** Heat storage change of the control volume bonded by the glacier front and the cross-fjord section S1.  $T_v$  is the temperature of the control volume.

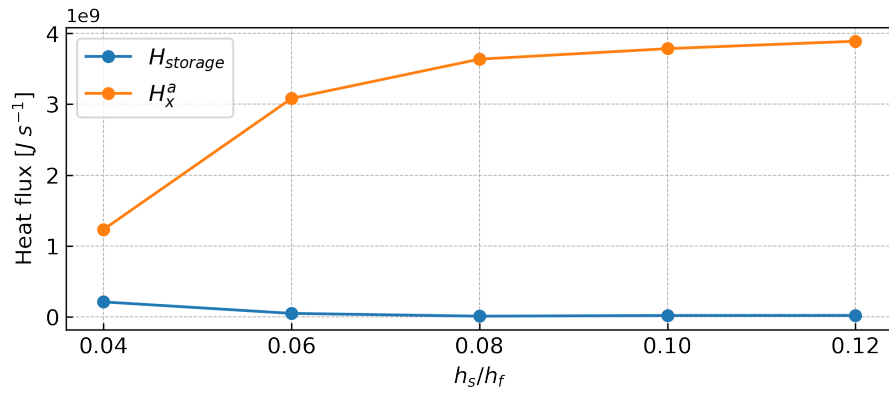

**Figure S4.** Heat storage ( $H_{storage}$ ) vs. horizontal heat transport divergence ( $H_x^a$ ) for the control volume bonded by the glacier front and the cross-fjord section S1 in the base case. Results are averaged over the last 14 days of simulations.

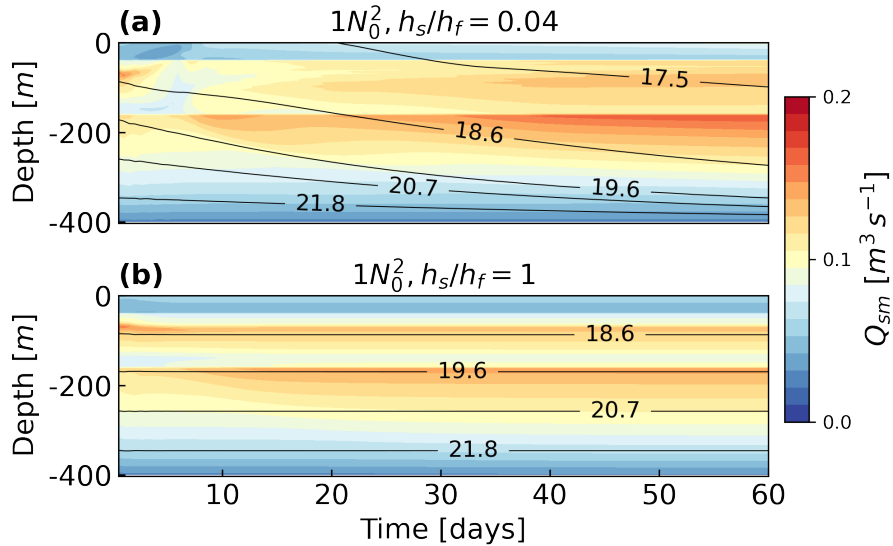

**Figure S5.** The evolution of submarine melting with (a) and without (b) a sill. Forcing and initial conditions other than the sill depth are the same.

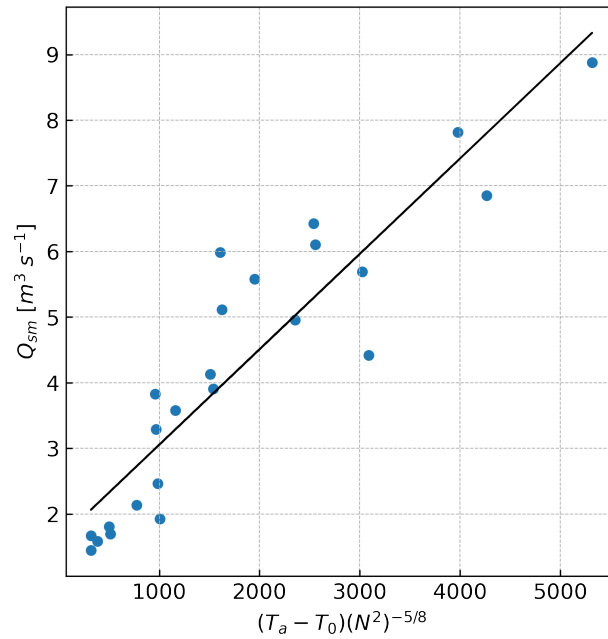

**Figure S6.** Dependency of  $Q_{sm}$  on combined fjord conditions  $((T_a - T_0)(N^2)^{-5/8})$  from model outputs. Results are averaged over the last 14 days of simulations. The solid black line is the linear regression with a slope of  $k = 1.45 \times 10^{-3}$ .

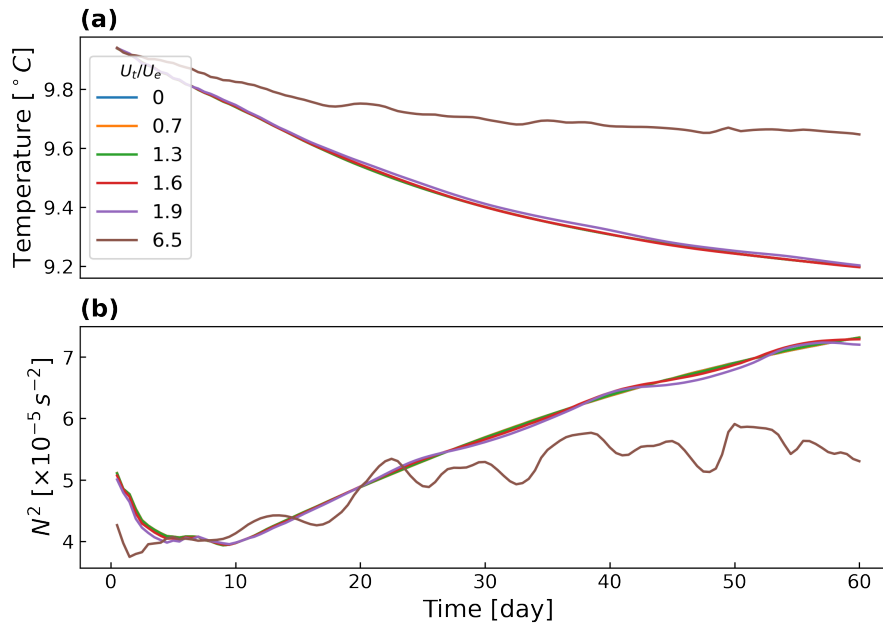

**Figure S7.** The evolution of depth-averaged temperature (a) and stratification (b) near the glacier with varying tidal forcing ( $U_t/U_e$ ).
